# Supplementary material for: Malaria infection and predictor factors among Chadian nomads’ children
Source: BMC Public Health. 2024 Mar 28;24:918. doi: 10.1186/s12889-024-18454-5 (PMC10979592; doi:10.1186/s12889-024-18454-5)
Supplement: Supplementary file 3 — Supplementary Material 3 [file 12889_2024_18454_MOESM3_ESM.xlsx]

## Sheet: Feuil1
No	Code	province	district	health center	age_range	gender	rdt	temperature	area	ethnic	month	smc_area	season	nbr_adult	nbr_youth	numbr_children	size_hhd	maritalstat_hhhd	source_water	kit_solar	poste_radio	tv	mobile_phone	char_animal	motorcycle	car	house	land_cultivat	caw	sheep_goat	caract_fever	caract_shiver	caract_musclepain	caract_stomacpain	caract_diarrhee	caract_nausea	caract_vomit	period_nov_dec	period_jan_apr	period_may	period_june	period_july_sept	period_oct	fact_water	fact_hit	fact_mosquito	fact_hungry	fact_food	fact_sort
1	METD22130221	Hadjer Lamis	Massaguet		12_60	female	negative		rural	Daza	february	Yes	wet	5	8	8	21	polygamous	drilling_water	No	No	Yes	No	Yes	No	No	Yes	No	30	42	Yes	No	Yes	Yes	No	Yes	No	Yes	No	No	No	Yes	Yes	No	No	Yes	No	No	No
2	METD23130221	Hadjer Lamis	Massaguet		12_60	male	positive		rural	Daza	february	Yes	wet	3	10	3	16	polygamous	well	No	No	No	Yes	Yes	No	No	No	No	35	50	Yes	No	Yes	No	No	Yes	No	Yes	No	No	No	Yes	Yes	No	No	Yes	Yes	No	No
3	METD24130221	Hadjer Lamis	Massaguet		12_60	male	negative		rural	Daza	february	Yes	wet	2	1	2	5	monogamous	well	No	No	Yes	No	No	No	No	No	No	32	47	Yes	No	No	No	No	No	No	Yes	Yes	No	No	Yes	No	No	No	Yes	Yes	No	No
4	METD25130221	Hadjer Lamis	Massaguet		12_60	female	positive		rural	Daza	february	Yes	wet	3	4	2	9	monogamous	well	No	Yes	No	Yes	No	No	No	No	No	50	23	No	No	Yes	Yes	No	No	No	No	No	No	No	Yes	No	No	No	Yes	Yes	No	No
5	METD26130221	Hadjer Lamis	Massaguet		12_60	male	negative		rural	Daza	february	Yes	wet	5	3	2	10	monogamous	well	No	No	Yes	No	Yes	No	No	No	No	60	25	Yes	No	No	No	No	No	No	No	No	No	No	Yes	No	No	No	No	Yes	Yes	No
6	METD27130221	Hadjer Lamis	Massaguet		12_60	male	negative		rural	Daza	february	Yes	wet	1	3	3	7	monogamous	well	No	No	No	Yes	Yes	No	No	No	No	72	50	Yes	No	Yes	Yes	No	No	No	No	No	No	No	Yes	No	Yes	Yes	Yes	Yes	No	No
7	METD28130221	Hadjer Lamis	Massaguet		12_60	female	positive		rural	Daza	february	Yes	wet	1	2	2	5	monogamous	well	No	No	No	No	Yes	No	No	No	No	20	30	Yes	No	Yes	No	No	No	No	No	No	No	No	Yes	No	Yes	Yes	No	No	No	No
8	METD29130221	Hadjer Lamis	Massaguet		12_60	male	negative		rural	Daza	february	Yes	wet	6	5	2	13	monogamous	well	No	No	No	Yes	Yes	No	No	No	No	64	35	No	No	Yes	No	No	No	No	Yes	No	No	No	Yes	No	Yes	No	No	Yes	No	No
9	METD30130221	Hadjer Lamis	Massaguet		12_60	male	negative		rural	Daza	february	Yes	wet	1	2	3	6	monogamous	well	No	No	No	Yes	Yes	No	No	No	No	23	50	No	No	Yes	No	Yes	No	No	No	Yes	No	No	Yes	No	No	No	No	No	Yes	No
10	METD31130221	Hadjer Lamis	Massaguet		12_60	female	negative		rural	Daza	february	Yes	wet	1	2	2	5	monogamous	well	No	No	No	Yes	Yes	No	No	No	No	63	12	No	No	Yes	No	Yes	No	No	No	Yes	No	No	Yes	No	No	Yes	No	No	Yes	No
11	METD32130221	Hadjer Lamis	Massaguet		12_60	female	positive		rural	Daza	february	Yes	wet	1	2	3	6	monogamous	well	No	No	No	Yes	No	No	No	No	No	71	23	No	No	Yes	No	No	Yes	No	No	Yes	No	Yes	Yes	No	Yes	Yes	No	No	No	No
12	METD33130221	Hadjer Lamis	Massaguet		12_60	male	negative		rural	Daza	february	Yes	wet	2	3	4	9	monogamous	well	No	No	No	Yes	No	No	No	No	No	80	12	No	No	Yes	Yes	No	No	No	Yes	No	No	No	Yes	No	No	No	Yes	No	No	No
13	METD34130221	Hadjer Lamis	Massaguet		12_60	male	negative		rural	Daza	february	Yes	wet	2	3	3	8	monogamous	well	No	No	No	Yes	No	No	No	No	No	21	23	No	No	Yes	Yes	Yes	No	No	Yes	No	No	No	Yes	No	No	No	Yes	Yes	No	No
14	METD35130221	Hadjer Lamis	Massaguet		12_60	female	negative		rural	Daza	february	Yes	wet	1	2	4	7	monogamous	well	No	No	No	Yes	Yes	No	No	No	No	21	6	No	No	Yes	Yes	No	No	Yes	Yes	No	No	No	Yes	No	Yes	Yes	No	No	No	No
15	METD36130221	Hadjer Lamis	Massaguet		12_60	female	negative		rural	Daza	february	Yes	wet	1	2	3	6	monogamous	well	No	No	No	Yes	No	No	No	No	No	53	12	No	No	Yes	No	Yes	No	No	Yes	No	Yes	No	No	No	Yes	Yes	No	No	No	No
16	METD37130221	Hadjer Lamis	Massaguet		12_60	male	negative		rural	Daza	february	Yes	wet	1	2	3	6	monogamous	well	No	No	No	Yes	No	No	No	No	No	50	23	No	No	Yes	No	No	No	No	Yes	No	No	No	Yes	No	Yes	No	Yes	No	No	No
17	METD1140221	Hadjer Lamis	Massaguet		12_60	female	positive		rural	Daza	february	Yes	wet	1	2	3	6	monogamous	well	No	No	No	Yes	Yes	No	No	No	No	30	20	Yes	No	Yes	No	No	No	No	Yes	No	No	No	Yes	No	Yes	Yes	Yes	No	No	No
18	METD2140221	Hadjer Lamis	Massaguet		12_60	female	negative		rural	Daza	february	Yes	wet	1	4	3	8	monogamous	surface_water	No	No	No	Yes	Yes	No	No	No	No	52	33	No	No	Yes	Yes	No	No	No	Yes	Yes	No	No	No	No	Yes	Yes	No	No	No	No
19	METD3140221	Hadjer Lamis	Massaguet		12_60	male	negative		rural	Daza	february	Yes	wet	1	3	4	8	polygamous	well	No	No	No	Yes	Yes	No	No	No	No	80	0	Yes	No	Yes	No	No	No	No	Yes	Yes	No	No	No	No	Yes	No	Yes	No	No	No
20	METD4140221	Hadjer Lamis	Massaguet		12_60	female	negative		rural	Daza	february	Yes	wet	1	5	1	7	monogamous	well	No	No	No	Yes	Yes	No	No	No	No	70	5	No	No	Yes	No	No	No	No	Yes	Yes	No	No	Yes	No	Yes	Yes	No	No	No	No
21	METD5140221	Hadjer Lamis	Massaguet		12_60	male	negative		rural	Daza	february	Yes	wet	1	4	2	7	monogamous	well	No	No	No	Yes	Yes	No	No	No	No	27	12	No	No	Yes	No	No	No	No	Yes	Yes	No	Yes	No	No	No	Yes	No	Yes	No	No
22	METD6140221	Hadjer Lamis	Massaguet		12_60	male	negative		rural	Daza	february	Yes	wet	1	2	3	6	monogamous	well	No	No	No	Yes	No	No	No	No	No	17	10	No	No	Yes	Yes	No	No	No	Yes	Yes	No	No	No	No	Yes	No	No	No	Yes	No
23	METD7140221	Hadjer Lamis	Massaguet		12_60	female	negative		rural	Daza	february	Yes	wet	1	1	2	4	monogamous	well	No	No	No	Yes	Yes	No	No	No	No	32	12	No	No	Yes	No	No	No	No	Yes	No	No	No	No	No	No	Yes	No	No	No	No
24	METD8140221	Hadjer Lamis	Massaguet		12_60	female	negative		rural	Daza	february	Yes	wet	1	2	1	4	divorce	drilling_water	No	No	No	No	Yes	Yes	No	No	No	29	20	Yes	No	Yes	No	No	No	No	Yes	Yes	No	No	No	No	Yes	Yes	No	No	No	No
25	METD9140221	Hadjer Lamis	Massaguet		12_60	female	negative		rural	Daza	february	Yes	wet	2	4	3	9	polygamous	well	No	No	No	Yes	Yes	No	No	No	No	27	60	No	Yes	Yes	No	Yes	No	No	Yes	Yes	No	No	No	No	No	No	Yes	No	Yes	No
26	METD10140221	Hadjer Lamis	Massaguet		3_12	male	positive		rural	Daza	february	Yes	wet	1	2	3	6	monogamous	well	No	No	No	Yes	Yes	No	No	No	No	37	25	Yes	No	Yes	No	No	No	No	Yes	No	No	No	Yes	No	Yes	No	No	Yes	Yes	No
27	METD11140221	Hadjer Lamis	Massaguet		3_12	female	negative		rural	Daza	february	Yes	wet	1	2	3	6	monogamous	well	No	No	No	Yes	No	No	No	No	No	52	14	No	No	Yes	Yes	No	No	No	Yes	Yes	Yes	No	No	No	No	No	Yes	Yes	No	No
28	METD12140221	Hadjer Lamis	Massaguet		12_60	female	negative		rural	Daza	february	Yes	wet	63	2	4	69	monogamous	well	No	No	No	Yes	Yes	No	No	No	No	10	20	Yes	No	Yes	No	No	No	No	Yes	Yes	No	No	No	No	No	Yes	No	No	Yes	No
29	METD13140221	Hadjer Lamis	Massaguet		12_60	male	positive		rural	Daza	february	Yes	wet	1	2	2	5	monogamous	well	No	No	No	Yes	Yes	No	No	No	No	23	60	No	No	Yes	No	Yes	No	No	Yes	Yes	No	No	No	No	Yes	Yes	Yes	No	No	No
30	METD14140221	Hadjer Lamis	Massaguet		12_60	female	negative		rural	Daza	february	Yes	wet	1	2	5	8	polygamous	well	No	No	No	Yes	Yes	No	No	No	No	29	37	Yes	Yes	Yes	No	No	No	No	Yes	Yes	No	No	Yes	No	Yes	No	No	Yes	Yes	No
31	METD15140221	Hadjer Lamis	Massaguet		12_60	female	negative		rural	Daza	february	Yes	wet	1	1	3	5	monogamous	well	No	No	No	Yes	Yes	No	No	No	No	33	92	No	No	Yes	Yes	No	No	No	Yes	Yes	No	No	Yes	No	No	Yes	Yes	No	No	No
32	METD16140221	Hadjer Lamis	Massaguet		12_60	male	negative		rural	Daza	february	Yes	wet	1	3	2	6	monogamous	surface_water	No	No	No	Yes	Yes	No	No	No	No	50	40	No	Yes	Yes	No	Yes	No	No	Yes	Yes	No	No	Yes	No	Yes	Yes	No	No	No	No
33	METD17140221	Hadjer Lamis	Massaguet		12_60	male	positive		rural	Daza	february	Yes	wet	4	1	3	8	monogamous	well	No	No	No	Yes	Yes	No	No	No	No	88	122	No	No	Yes	No	No	Yes	No	Yes	Yes	No	No	No	No	Yes	Yes	No	No	No	No
34	METD1	Hadjer Lamis	Massaguet		3_12	female	negative		rural	Daza	august	Yes	rainy	5	4	2	11	polygamous	surface_water	No	No	No	Yes	Yes	No	No	No	No	60	25	Yes	No	No	Yes	Yes	No	Yes	No	No	No	No	Yes	Yes	Yes	No	Yes	Yes	No	No
35	METD2	Hadjer Lamis	Massaguet		3_12	female	negative		rural	Daza	august	Yes	rainy	4	5	1	10	polygamous	surface_water	No	No	No	Yes	Yes	No	No	No	No	45	22	Yes	No	No	No	Yes	No	Yes	No	No	No	No	Yes	Yes	Yes	No	Yes	Yes	Yes	No
36	METD3	Hadjer Lamis	Massaguet		12_60	male	negative		rural	Daza	august	Yes	rainy	3	2	2	7	monogamous	well	No	No	No	No	Yes	No	No	No	No	38	15	Yes	No	No	No	No	No	Yes	No	No	No	No	Yes	Yes	No	No	Yes	Yes	Yes	No
37	METD4	Hadjer Lamis	Massaguet		12_60	male	negative		rural	Daza	august	Yes	rainy	4	3	2	9	polygamous	well	No	No	No	Yes	Yes	No	No	No	No	50	23	Yes	No	No	No	Yes	No	Yes	No	No	No	No	Yes	Yes	No	No	Yes	Yes	Yes	No
38	METD5	Hadjer Lamis	Massaguet		12_60	male	negative		rural	Daza	august	Yes	rainy	3	2	1	6	monogamous	well	No	No	No	Yes	Yes	No	No	No	No	38	18	Yes	No	No	No	No	No	Yes	No	No	No	No	Yes	No	No	No	Yes	No	Yes	No
39	METD6	Hadjer Lamis	Massaguet		12_60	male	negative		rural	Daza	august	Yes	rainy	4	3	3	10	polygamous	well	No	No	No	Yes	Yes	No	No	No	No	58	25	Yes	No	No	Yes	No	No	Yes	No	No	No	No	Yes	No	Yes	No	Yes	Yes	No	No
40	METD7	Hadjer Lamis	Massaguet		12_60	male	negative		rural	Daza	august	Yes	rainy	4	5	2	11	monogamous	well	No	No	No	Yes	Yes	No	No	No	No	45	18	Yes	No	No	Yes	No	No	Yes	No	No	No	No	Yes	No	No	No	Yes	No	Yes	No
41	METD8	Hadjer Lamis	Massaguet		12_60	male	negative		rural	Daza	august	Yes	rainy	2	3	1	6	monogamous	well	No	No	No	Yes	Yes	No	No	No	No	35	10	Yes	No	No	No	Yes	No	Yes	No	No	No	No	Yes	No	No	No	Yes	Yes	No	No
42	METD9	Hadjer Lamis	Massaguet		12_60	male	negative		rural	Daza	august	Yes	rainy	4	2	1	7	monogamous	well	No	No	No	Yes	Yes	No	No	No	No	25	16	Yes	No	Yes	No	No	No	Yes	No	No	No	No	Yes	No	No	No	Yes	Yes	No	No
43	METD10	Hadjer Lamis	Massaguet		12_60	male	positive		rural	Daza	august	Yes	rainy	2	2	1	5	widow	well	No	No	No	No	Yes	No	No	No	No	48	25	Yes	No	No	No	No	No	Yes	No	No	No	No	Yes	No	No	No	Yes	No	Yes	No
44	METD11	Hadjer Lamis	Massaguet		12_60	male	negative		rural	Daza	august	Yes	rainy	3	4	2	9	monogamous	well	No	No	No	No	Yes	No	No	No	No	48	25	Yes	No	Yes	No	No	No	Yes	No	No	No	No	Yes	Yes	Yes	No	Yes	Yes	No	No
45	METD12	Hadjer Lamis	Massaguet		12_60	female	negative		rural	Daza	august	Yes	rainy	2	2	1	5	monogamous	well	No	No	No	Yes	Yes	No	No	No	No	25	17	Yes	No	Yes	No	No	No	Yes	No	No	No	No	Yes	No	Yes	No	Yes	Yes	No	No
46	METD13	Hadjer Lamis	Massaguet		12_60	female	negative		rural	Daza	august	Yes	rainy	4	5	3	12	polygamous	well	No	No	No	No	Yes	No	No	No	No	73	28	Yes	No	Yes	No	No	No	Yes	No	No	No	No	Yes	Yes	Yes	No	Yes	Yes	No	No
47	METD14	Hadjer Lamis	Massaguet		12_60	male	negative		rural	Daza	august	Yes	rainy	2	2	1	5	monogamous	well	No	No	No	Yes	Yes	No	No	No	No	36	12	Yes	No	Yes	No	No	No	Yes	No	No	No	No	Yes	No	No	No	Yes	Yes	No	No
48	METD15	Hadjer Lamis	Massaguet		12_60	female	negative		rural	Daza	august	Yes	rainy	3	2	0	5	widow	well	No	No	No	No	Yes	No	No	No	No	45	24	Yes	No	No	No	No	No	Yes	No	No	No	No	Yes	No	No	No	Yes	No	No	No
49	METD16	Hadjer Lamis	Massaguet		12_60	male	negative		rural	Daza	august	Yes	rainy	2	3	1	6	monogamous	well	No	No	No	No	Yes	No	No	No	No	38	26	Yes	No	Yes	No	No	No	Yes	No	No	No	No	Yes	No	Yes	No	No	Yes	No	No
50	METD17	Hadjer Lamis	Massaguet		12_60	female	negative		rural	Daza	august	Yes	rainy	5	3	3	11	polygamous	well	No	No	No	No	Yes	No	No	No	No	65	35	Yes	No	Yes	No	No	No	Yes	No	No	No	No	Yes	No	No	No	Yes	Yes	No	No
51	METD18	Hadjer Lamis	Massaguet		3_12	female	negative		rural	Daza	august	Yes	rainy	2	0	2	4	monogamous	well	No	No	No	Yes	Yes	No	No	No	No	35	21	Yes	No	No	No	No	No	Yes	No	No	No	No	Yes	No	Yes	No	Yes	Yes	No	No
52	METD19	Hadjer Lamis	Massaguet		12_60	female	negative		rural	Daza	august	Yes	rainy	3	4	2	9	monogamous	well	No	No	No	Yes	Yes	No	No	No	No	56	25	Yes	No	Yes	No	No	No	Yes	No	No	No	No	Yes	No	Yes	No	Yes	Yes	No	No
53	METD20	Hadjer Lamis	Massaguet		12_60	male	negative		rural	Daza	august	Yes	rainy	2	2	1	5	monogamous	well	No	No	No	Yes	Yes	No	No	No	No	30	18	Yes	No	Yes	No	No	No	Yes	No	No	No	No	Yes	No	Yes	No	Yes	Yes	No	No
54	METD21	Hadjer Lamis	Massaguet		12_60	female	negative		rural	Daza	august	Yes	rainy	3	4	2	9	widow	well	No	No	No	No	Yes	No	No	No	No	30	17	Yes	No	Yes	No	No	No	Yes	No	No	No	No	Yes	No	Yes	No	Yes	Yes	No	No
55	METD22	Hadjer Lamis	Massaguet		12_60	male	negative		rural	Daza	august	Yes	rainy	4	5	3	12	polygamous	surface_water	No	No	No	No	Yes	No	No	No	No	58	27	Yes	No	No	No	No	No	Yes	No	No	No	No	No	Yes	Yes	No	Yes	Yes	No	No
56	METD23	Hadjer Lamis	Massaguet		12_60	male	negative		rural	Daza	august	Yes	rainy	3	3	2	8	monogamous	well	No	No	No	Yes	Yes	No	No	No	No	57	23	Yes	No	No	No	No	No	Yes	No	No	No	No	Yes	No	Yes	No	Yes	Yes	No	No
57	METD24	Hadjer Lamis	Massaguet		12_60	male	positive		rural	Daza	august	Yes	rainy	3	4	1	8	monogamous	well	No	No	No	Yes	Yes	No	No	No	No	25	14	Yes	No	No	No	No	No	Yes	No	No	No	No	Yes	No	Yes	No	Yes	Yes	No	No
58	METD25	Hadjer Lamis	Massaguet		12_60	male	negative		rural	Daza	august	Yes	rainy	3	3	2	8	widow	well	No	No	No	No	Yes	No	No	No	No	42	21	Yes	No	No	No	No	No	Yes	No	No	No	No	Yes	No	Yes	No	Yes	Yes	No	No
59	METD26	Hadjer Lamis	Massaguet		12_60	male	negative		rural	Daza	august	Yes	rainy	2	2	1	5	monogamous	well	No	No	No	Yes	Yes	Yes	No	No	No	50	60	No	Yes	Yes	Yes	No	No	No	No	No	No	Yes	Yes	Yes	Yes	Yes	No	Yes	Yes	No
60	METD27	Hadjer Lamis	Massaguet		12_60	female	negative		rural	Daza	august	Yes	rainy	2	4	2	8	monogamous	well	Yes	No	No	Yes	Yes	No	No	No	No	40	24	No	No	Yes	No	No	Yes	Yes	No	No	No	No	Yes	Yes	Yes	Yes	No	Yes	Yes	No
61	METD28	Hadjer Lamis	Massaguet		12_60	male	negative		rural	Daza	august	Yes	rainy	3	2	3	8	monogamous	well	No	No	No	Yes	Yes	No	No	No	No	50	30	No	No	Yes	Yes	No	No	Yes	No	Yes	No	No	Yes	Yes	No	Yes	Yes	Yes	No	No
62	METD29	Hadjer Lamis	Massaguet		12_60	male	negative		rural	Daza	august	Yes	rainy	2	0	3	5	monogamous	well	Yes	No	No	Yes	Yes	No	No	No	No	50	80	No	Yes	Yes	Yes	No	No	Yes	No	No	No	Yes	Yes	Yes	Yes	No	Yes	Yes	No	No
63	METD30	Hadjer Lamis	Massaguet		12_60	female	negative		rural	Daza	august	Yes	rainy	1	2	2	5	monogamous	well	Yes	No	No	Yes	Yes	No	No	No	No	50	120	Yes	Yes	No	Yes	No	No	No	No	No	Yes	Yes	Yes	Yes	Yes	Yes	Yes	No	Yes	No
64	METD31	Hadjer Lamis	Massaguet		12_60	male	negative		rural	Daza	august	Yes	rainy	2	0	3	5	monogamous	well	Yes	No	No	Yes	Yes	No	No	No	No	30	150	Yes	No	Yes	No	Yes	No	Yes	Yes	No	No	No	Yes	Yes	No	Yes	Yes	No	Yes	No
65	METD32	Hadjer Lamis	Massaguet		12_60	female	negative		rural	Daza	august	Yes	rainy	2	1	3	6	monogamous	well	Yes	No	No	Yes	Yes	Yes	No	No	No	30	90	Yes	No	Yes	No	No	No	Yes	No	No	No	Yes	Yes	Yes	No	No	Yes	No	Yes	No
66	METD33	Hadjer Lamis	Massaguet		12_60	male	negative		rural	Daza	august	Yes	rainy	2	3	2	7	monogamous	well	Yes	No	No	Yes	Yes	No	No	No	No	50	40	No	No	Yes	No	No	Yes	Yes	Yes	No	No	No	Yes	Yes	Yes	Yes	Yes	Yes	No	No
67	METD34	Hadjer Lamis	Massaguet		12_60	female	negative		rural	Daza	august	Yes	rainy	2	0	2	4	monogamous	well	Yes	No	No	Yes	Yes	No	No	No	No	60	10	Yes	No	No	Yes	Yes	No	Yes	Yes	No	Yes	No	Yes	Yes	No	Yes	Yes	No	No	No
68	METD35	Hadjer Lamis	Massaguet		12_60	female	negative		rural	Daza	august	Yes	rainy	3	2	2	7	monogamous	surface_water	No	No	No	Yes	Yes	No	No	No	No	50	40	Yes	No	Yes	No	No	No	Yes	Yes	No	No	No	Yes	Yes	Yes	Yes	Yes	No	No	No
69	CHAP1	Chari Baguirmi	Massenya	Niellim	12_60	female	negative		rural	Fulani	february	Yes	wet	3	6	3	12	monogamous	surface_water	No	No	No	No	Yes	No	No	No	No	60	20	No	No	Yes	Yes	No	No	No	Yes	Yes	Yes	Yes	Yes	No	No	Yes	Yes	Yes	Yes	No
70	CHAP2	Chari Baguirmi	Massenya	Niellim	12_60	female	negative		rural	Fulani	february	Yes	wet	2	4	2	8	widow	surface_water	No	No	No	Yes	Yes	No	No	No	No	50	24	No	No	No	No	No	Yes	Yes	No	No	No	No	Yes	Yes	Yes	Yes	No	No	Yes	No
71	CHAP3	Chari Baguirmi	Massenya	Niellim	12_60	female	negative		rural	Fulani	february	Yes	wet	3	6	3	12	monogamous	surface_water	Yes	Yes	No	Yes	Yes	Yes	No	No	No	72	47	Yes	Yes	No	Yes	Yes	No	No	Yes	Yes	Yes	Yes	Yes	Yes	No	No	Yes	Yes	Yes	No
72	CHAP4	Chari Baguirmi	Massenya	Niellim	12_60	male	negative		rural	Fulani	february	Yes	wet	2	4	1	7	monogamous	drilling_water	No	No	No	Yes	Yes	Yes	No	No	No	39	22	Yes	No	Yes	Yes	No	No	Yes	No	No	Yes	No	Yes	No	Yes	No	Yes	No	Yes	No
73	CHAP5	Chari Baguirmi	Massenya	Niellim	12_60	female	negative		rural	Fulani	february	Yes	wet	2	2	2	6	monogamous	surface_water	No	No	No	Yes	Yes	No	No	No	No	68	25	Yes	No	No	Yes	No	No	Yes	No	Yes	No	Yes	Yes	No	No	No	Yes	No	Yes	No
74	CHAP6	Chari Baguirmi	Massenya	Niellim	12_60	female	negative		rural	Fulani	february	Yes	wet	2	3	4	9	monogamous	surface_water	No	Yes	No	Yes	Yes	No	No	No	No	30	90	Yes	No	Yes	Yes	Yes	No	No	Yes	No	No	No	Yes	Yes	Yes	No	No	Yes	Yes	No
75	CHAP7	Chari Baguirmi	Massenya	Niellim	12_60	female	negative		rural	Fulani	february	Yes	wet	2	2	1	5	monogamous	surface_water	Yes	Yes	Yes	No	Yes	No	No	No	No	23	59	Yes	Yes	No	Yes	No	Yes	Yes	Yes	Yes	Yes	Yes	Yes	Yes	Yes	Yes	Yes	No	Yes	No
76	CHAP8	Chari Baguirmi	Massenya	Niellim	12_60	female	negative		rural	Fulani	february	Yes	wet	3	4	3	10	monogamous	surface_water	Yes	Yes	Yes	No	Yes	No	No	No	No	27	105	Yes	Yes	No	No	Yes	No	No	Yes	No	No	No	Yes	Yes	No	No	Yes	No	Yes	Yes
77	CHAP9	Chari Baguirmi	Massenya	Niellim	12_60	female	negative		rural	Fulani	february	Yes	wet	2	3	2	7	monogamous	surface_water	Yes	Yes	No	Yes	Yes	No	No	No	No	36	100	No	No	No	Yes	No	No	Yes	Yes	No	No	Yes	Yes	Yes	No	Yes	Yes	No	Yes	No
78	CHAP10	Chari Baguirmi	Massenya	Niellim	12_60	female	negative		rural	Fulani	february	Yes	wet	3	3	2	8	monogamous	well	No	Yes	Yes	No	No	No	No	No	No	23	78	Yes	No	Yes	No	No	No	Yes	Yes	No	No	No	Yes	Yes	Yes	Yes	No	No	Yes	No
79	CHAP11	Chari Baguirmi	Massenya	Niellim	12_60	male	positive		rural	Fulani	february	Yes	wet	4	5	3	12	polygamous	drilling_water	No	Yes	No	Yes	Yes	No	No	No	No	60	40	Yes	No	No	No	No	No	Yes	Yes	No	No	Yes	Yes	Yes	Yes	Yes	Yes	No	Yes	No
80	CHAP12	Chari Baguirmi	Massenya	Niellim	12_60	female	negative		rural	Fulani	february	Yes	wet	2	2	3	7	monogamous	drilling_water	No	No	No	Yes	Yes	No	No	No	No	20	56	Yes	No	Yes	Yes	No	No	No	No	No	No	No	Yes	Yes	No	No	Yes	No	Yes	No
81	CHAP13	Chari Baguirmi	Massenya	Niellim	3_12	female	negative		rural	Fulani	february	Yes	wet	2	2	2	6	monogamous	surface_water	No	No	No	Yes	No	No	No	No	No	80	60	Yes	No	Yes	No	No	No	Yes	No	No	No	No	Yes	Yes	No	No	Yes	No	Yes	No
82	CHAP14	Chari Baguirmi	Massenya	Niellim	12_60	female	positive		rural	Fulani	february	Yes	wet	2	2	3	7	monogamous	drilling_water	No	No	No	Yes	No	No	No	No	No	42	53	Yes	No	Yes	No	Yes	No	Yes	No	No	No	No	Yes	Yes	Yes	Yes	Yes	No	Yes	No
83	CHAP15	Chari Baguirmi	Massenya	Niellim	12_60	female	positive		rural	Fulani	february	Yes	wet	1	4	2	7	widow	surface_water	No	No	No	No	Yes	No	No	No	No	29	94	Yes	No	Yes	No	No	No	Yes	No	No	No	Yes	Yes	Yes	Yes	Yes	Yes	No	No	No
84	DLIP1080221	Hadjer Lamis	Dourbali		3_12	female	negative	37.3	rural	Fulani	august	Yes	rainy	2	3	3	8	polygamous	drilling_water	No	No	No	No	Yes	No	No	No	No	150	80	Yes	No	Yes	Yes	No	No	Yes	Yes	Yes	Yes	Yes	Yes	Yes	Yes	No	No	Yes	Yes	No
85	DLIP2080221	Hadjer Lamis	Dourbali		12_60	male	negative	37.9	rural	Fulani	august	Yes	rainy	1	2	1	4	monogamous	drilling_water	No	No	No	Yes	Yes	Yes	No	No	No	80	30	Yes	No	Yes	No	No	No	Yes	No	No	No	No	Yes	No	No	No	Yes	No	Yes	No
86	DLIP3080221	Hadjer Lamis	Dourbali		12_60	female	negative	37.4	rural	Fulani	august	Yes	rainy	1	2	2	5	monogamous	drilling_water	No	No	No	No	Yes	Yes	No	No	No	90	150	Yes	No	Yes	No	No	No	No	No	No	No	No	Yes	No	Yes	Yes	No	No	No	No
87	DLIP4080221	Hadjer Lamis	Dourbali		3_12	male	positive	36.6	rural	Fulani	august	Yes	rainy	2	5	3	10	polygamous	drilling_water	No	No	No	Yes	Yes	Yes	No	No	No	60	100	Yes	No	Yes	No	No	No	Yes	No	No	No	Yes	Yes	Yes	Yes	Yes	No	No	No	No
88	DLIP5080221	Hadjer Lamis	Dourbali		12_60	male	positive	36.9	rural	Fulani	august	Yes	rainy	1	3	4	8	polygamous	drilling_water	No	No	No	No	Yes	Yes	No	No	No	100	60	Yes	No	Yes	No	No	No	No	No	No	No	No	Yes	No	Yes	Yes	No	No	No	No
89	DLIP6080221	Hadjer Lamis	Dourbali		12_60	female	positive	37.3	rural	Fulani	august	Yes	rainy	1	2	2	5	monogamous	drilling_water	No	Yes	No	Yes	No	No	No	No	No	200	100	Yes	Yes	Yes	No	No	No	No	No	No	No	Yes	Yes	Yes	Yes	Yes	Yes	No	Yes	No
90	DLIP7080221	Hadjer Lamis	Dourbali		12_60	female	negative	37	rural	Fulani	august	Yes	rainy	3	6	7	16	polygamous	drilling_water	No	No	No	Yes	Yes	Yes	No	No	No	100	50	Yes	No	Yes	Yes	No	No	Yes	Yes	Yes	Yes	Yes	Yes	Yes	Yes	Yes	No	No	Yes	No
91	DLIP8080221	Hadjer Lamis	Dourbali		12_60	female	positive	37.4	rural	Fulani	august	Yes	rainy	3	2	1	6	monogamous	drilling_water	No	Yes	No	Yes	Yes	Yes	No	No	No	100	80	Yes	Yes	Yes	No	Yes	No	Yes	No	No	No	No	Yes	Yes	Yes	No	Yes	No	Yes	Yes
92	DLIP9080221	Hadjer Lamis	Dourbali		12_60	male	negative	36.7	rural	Fulani	august	Yes	rainy	3	4	2	9	polygamous	drilling_water	No	Yes	No	Yes	Yes	Yes	No	No	No	120	90	Yes	No	Yes	Yes	No	Yes	No	No	No	Yes	No	Yes	No	Yes	Yes	No	No	No	No
93	DLIP10080221	Hadjer Lamis	Dourbali		12_60	male	negative	36.7	rural	Fulani	august	Yes	rainy	5	7	3	15	polygamous	drilling_water	No	No	No	Yes	Yes	Yes	No	No	No	250	100	Yes	Yes	Yes	Yes	Yes	Yes	Yes	No	No	Yes	Yes	Yes	No	Yes	Yes	No	No	No	No
94	DLIP11080221	Hadjer Lamis	Dourbali		12_60	male	negative	36.7	rural	Fulani	august	Yes	rainy	2	3	2	7	monogamous	drilling_water	No	No	No	No	No	No	No	No	No	50	80	Yes	No	No	Yes	No	No	Yes	No	No	Yes	Yes	No	Yes	Yes	No	No	No	Yes	No
95	DLIA1090221	Hadjer Lamis	Dourbali	Linia	12_60	male	positive	37.3	urban	Arab	february	Yes	wet	2	3	4	9	polygamous	drilling_water	No	No	No	Yes	Yes	No	No	No	No	120	30	Yes	Yes	Yes	No	No	No	Yes	No	No	No	No	Yes	No	No	No	Yes	No	No	No
96	DLIA2090221	Hadjer Lamis	Dourbali	Linia	12_60	male	negative	37	urban	Arab	february	Yes	wet	2	1	2	5	monogamous	drilling_water	No	Yes	No	No	Yes	Yes	No	No	No	100	25	Yes	No	Yes	No	No	Yes	Yes	No	No	No	Yes	Yes	Yes	Yes	No	Yes	No	Yes	No
97	DLIA3090221	Hadjer Lamis	Dourbali	Linia	12_60	male	negative	37.3	urban	Arab	february	Yes	wet	0	1	2	3	monogamous	drilling_water	No	Yes	No	No	Yes	Yes	No	No	No	150	50	Yes	Yes	Yes	No	No	No	Yes	No	No	No	Yes	No	Yes	Yes	No	Yes	No	No	No
98	DLIA4090221	Hadjer Lamis	Dourbali	Linia	12_60	female	positive	37.9	urban	Arab	february	Yes	wet	5	2	4	11	polygamous	well	No	Yes	No	No	No	Yes	No	No	No	80	20	Yes	No	Yes	No	No	No	Yes	No	No	Yes	No	Yes	No	Yes	No	Yes	No	No	No
99	DLIA5090221	Hadjer Lamis	Dourbali	Linia	12_60	male	positive	37.2	urban	Arab	february	Yes	wet	2	2	3	7	polygamous	drilling_water	No	No	No	Yes	Yes	Yes	No	No	No	120	60	Yes	Yes	Yes	Yes	Yes	Yes	Yes	No	No	No	No	Yes	No	Yes	No	Yes	No	Yes	No
100	DLIA6090221	Hadjer Lamis	Dourbali	Linia	12_60	female	positive	37.3	urban	Arab	february	Yes	wet	2	3	1	6	monogamous	drilling_water	No	Yes	No	Yes	Yes	Yes	No	No	Yes	250	50	Yes	No	Yes	No	Yes	No	Yes	No	No	No	No	Yes	No	No	Yes	Yes	No	No	No
101	DLIA7090221	Hadjer Lamis	Dourbali	Linia	12_60	female	negative	37.3	urban	Arab	february	Yes	wet	3	2	1	6	monogamous	drilling_water	No	No	No	No	Yes	Yes	No	No	Yes	270	20	Yes	Yes	Yes	Yes	Yes	Yes	Yes	No	No	No	Yes	Yes	Yes	Yes	No	Yes	No	No	No
102	DLIA8090221	Hadjer Lamis	Dourbali	Linia	12_60	male	positive	37.7	urban	Arab	february	Yes	wet	5	2	3	10	polygamous	drilling_water	No	No	No	Yes	Yes	No	No	No	No	180	60	Yes	No	Yes	No	No	Yes	Yes	No	No	No	No	Yes	No	Yes	Yes	Yes	No	No	No
103	DLIA9090221	Hadjer Lamis	Dourbali	Linia	12_60	male	positive	37.2	urban	Arab	february	Yes	wet	3	4	3	10	monogamous	drilling_water	No	Yes	No	Yes	No	Yes	No	No	No	200	50	Yes	Yes	Yes	Yes	No	No	Yes	No	No	No	Yes	No	No	Yes	Yes	Yes	No	No	No
104	DLIA10090221	Hadjer Lamis	Dourbali	Linia	12_60	male	negative	37	urban	Arab	february	Yes	wet	5	3	2	10	polygamous	drilling_water	No	Yes	No	Yes	Yes	Yes	No	No	Yes	158	46	Yes	No	Yes	No	No	No	Yes	No	No	No	No	Yes	No	Yes	No	Yes	No	No	No
105	DLIA11090221	Hadjer Lamis	Dourbali	Linia	12_60	male	positive	37.1	urban	Arab	february	Yes	wet	1	6	3	10	monogamous	drilling_water	No	No	No	Yes	Yes	Yes	No	No	No	150	20	Yes	Yes	Yes	Yes	Yes	Yes	Yes	Yes	Yes	Yes	Yes	Yes	Yes	Yes	No	Yes	No	Yes	No
106	DLIA12090221	Hadjer Lamis	Dourbali	Linia	3_12	male	positive	37.1	urban	Arab	february	Yes	wet	2	5	3	10	polygamous	drilling_water	No	No	No	Yes	Yes	No	No	No	No	80	20	Yes	No	Yes	No	No	No	Yes	No	No	No	Yes	Yes	Yes	Yes	No	Yes	No	Yes	No
107	DLIA13090221	Hadjer Lamis	Dourbali	Linia	12_60	female	negative	37.4	urban	Arab	february	Yes	wet	2	4	4	10	monogamous	drilling_water	No	No	No	Yes	No	Yes	No	No	No	100	30	Yes	No	Yes	Yes	No	Yes	Yes	No	No	No	Yes	Yes	Yes	Yes	Yes	No	No	Yes	No
108	DLIA14090221	Hadjer Lamis	Dourbali	Linia	12_60	male	negative	40.4	urban	Arab	february	Yes	wet	4	7	4	15	polygamous	drilling_water	No	No	No	Yes	Yes	Yes	No	No	No	350	50	Yes	No	Yes	Yes	Yes	Yes	Yes	No	No	No	Yes	Yes	Yes	Yes	Yes	No	No	Yes	No
109	DLIA15090221	Hadjer Lamis	Dourbali	Linia	3_12	male	negative	40	urban	Arab	february	Yes	wet	3	2	2	7	monogamous	drilling_water	No	Yes	No	No	Yes	Yes	No	No	No	200	50	Yes	Yes	Yes	Yes	Yes	Yes	Yes	Yes	Yes	Yes	Yes	Yes	Yes	Yes	No	No	Yes	Yes	No
110	DLIA16090221	Hadjer Lamis	Dourbali	Linia	3_12	male	negative	40.5	urban	Arab	february	Yes	wet	4	5	7	16	polygamous	drilling_water	No	No	No	Yes	Yes	Yes	No	No	Yes	90	30	Yes	No	Yes	No	No	Yes	Yes	No	No	No	No	Yes	Yes	Yes	Yes	Yes	No	No	No
111	DLIA17090221	Hadjer Lamis	Dourbali	Linia	12_60	female	negative	36.9	urban	Arab	february	Yes	wet	2	4	1	7	monogamous	drilling_water	No	No	No	No	Yes	No	No	No	No	150	40	Yes	Yes	Yes	No	No	No	Yes	No	No	Yes	Yes	Yes	Yes	Yes	Yes	Yes	No	Yes	No
112	DLIA18090221	Hadjer Lamis	Dourbali	Linia	12_60	female	negative	36.8	urban	Arab	february	Yes	wet	2	3	2	7	monogamous	drilling_water	No	No	No	No	No	No	No	No	No	80	12	Yes	Yes	Yes	No	No	No	Yes	No	No	No	No	Yes	No	Yes	Yes	No	No	Yes	No
113	DLIA19090221	Hadjer Lamis	Dourbali	Linia	12_60	male	negative	37.1	urban	Arab	february	Yes	wet	4	8	3	15	monogamous	drilling_water	No	No	No	Yes	No	No	No	No	No	21	0	Yes	No	No	No	No	No	Yes	Yes	Yes	Yes	Yes	Yes	Yes	No	No	No	No	Yes	No
114	DLIA20090221	Hadjer Lamis	Dourbali	Linia	12_60	male	negative	36.8	urban	Arab	february	Yes	wet	5	6	3	14	polygamous	drilling_water	No	Yes	No	Yes	Yes	No	No	No	No	220	50	Yes	Yes	Yes	Yes	Yes	Yes	Yes	Yes	Yes	Yes	Yes	Yes	Yes	Yes	Yes	No	Yes	No	No
115	DLIA21090221	Hadjer Lamis	Dourbali	Linia	12_60	female	negative	36.6	urban	Arab	february	Yes	wet	4	6	4	14	polygamous	drilling_water	No	Yes	No	Yes	Yes	No	No	No	No	250	50	Yes	Yes	No	No	No	No	Yes	No	No	No	Yes	Yes	Yes	No	No	Yes	No	Yes	No
116	DLIA22090221	Hadjer Lamis	Dourbali	Linia	12_60	female	negative	37.2	urban	Arab	february	Yes	wet	3	5	2	10	widow	drilling_water	No	Yes	No	Yes	No	No	No	No	No	80	25	Yes	No	Yes	No	No	No	Yes	Yes	Yes	Yes	Yes	Yes	Yes	Yes	Yes	No	No	Yes	No
117	MCIP1	Moyen Chari	Niellim	Niellim	12_60	female	negative	36.7	rural	Fulani	august	no	rainy	3	0	3	6	monogamous	surface_water	Yes	Yes	No	Yes	No	Yes	No	No	No	63	32	Yes	No	No	No	No	No	No	No	No	No	Yes	No	No	Yes	No	No	Yes	No	No
118	MCIP2	Moyen Chari	Niellim	Niellim	3_12	female	positive	36.6	rural	Fulani	august	no	rainy	2	2	2	6	monogamous	surface_water	No	Yes	No	Yes	No	No	No	No	No	21	17	Yes	No	No	No	No	No	Yes	No	No	No	No	Yes	No	Yes	No	Yes	Yes	No	No
119	MCIP3	Moyen Chari	Niellim	Niellim	3_12	male	negative	36	rural	Fulani	august	no	rainy	2	0	1	3	monogamous	surface_water	Yes	Yes	No	Yes	No	No	No	No	No	56	12	Yes	No	No	Yes	No	No	Yes	No	No	No	Yes	No	No	Yes	No	No	No	No	No
120	MCIP4	Moyen Chari	Niellim	Niellim	12_60	female	negative	36	rural	Fulani	august	no	rainy	6	2	2	10	monogamous	surface_water	No	No	No	Yes	No	No	No	No	No	103	42	Yes	Yes	No	No	Yes	Yes	Yes	No	No	No	Yes	No	No	Yes	No	Yes	Yes	No	No
121	MCIP5	Moyen Chari	Niellim	Niellim	12_60	male	positive	36.5	rural	Fulani	august	no	rainy	4	1	2	7	divorce	surface_water	No	No	No	Yes	Yes	Yes	No	No	No	33	15	Yes	Yes	Yes	No	Yes	No	Yes	No	No	No	Yes	No	No	Yes	No	No	No	No	No
122	MCIP6	Moyen Chari	Niellim	Niellim	12_60	male	positive	36	rural	Fulani	august	no	rainy	3	2	3	8	monogamous	surface_water	Yes	Yes	No	Yes	Yes	Yes	No	No	No	61	31	Yes	Yes	Yes	No	No	Yes	No	No	No	No	Yes	No	No	Yes	No	No	No	No	No
123	MCIP7	Moyen Chari	Niellim	Niellim	3_12	male	positive	36.8	rural	Fulani	august	no	rainy	3	0	0	3	widow	surface_water	No	No	No	No	Yes	No	No	No	No	37	11	Yes	No	No	No	No	No	Yes	No	No	No	Yes	Yes	No	No	No	No	No	No	Yes
124	MCIP8	Moyen Chari	Niellim	Niellim	12_60	male	positive	36.5	rural	Fulani	august	no	rainy	8	4	1	13	monogamous	surface_water	Yes	Yes	No	Yes	Yes	Yes	No	No	No	70	41	Yes	Yes	No	No	No	Yes	Yes	No	No	No	Yes	No	No	Yes	No	No	No	No	Yes
125	MCIP9	Moyen Chari	Niellim	Niellim	12_60	female	negative	35.5	rural	Fulani	august	no	rainy	3	2	2	7	monogamous	surface_water	No	No	No	Yes	Yes	Yes	No	No	No	31	12	Yes	No	No	No	No	No	Yes	No	No	No	Yes	No	No	Yes	No	No	No	No	No
126	MCIP10	Moyen Chari	Niellim	Niellim	12_60	female	negative	36.7	rural	Fulani	august	no	rainy	2	0	1	3	monogamous	surface_water	No	No	No	Yes	Yes	Yes	No	No	No	22	9	Yes	Yes	No	No	No	No	Yes	No	No	No	Yes	No	No	No	No	Yes	No	No	No
127	MCIP11	Moyen Chari	Niellim	Niellim	12_60	male	positive	37	rural	Fulani	august	no	rainy	5	4	3	12	monogamous	surface_water	No	No	No	No	Yes	Yes	No	No	No	44	21	Yes	No	No	No	No	No	Yes	No	No	No	Yes	No	No	Yes	No	Yes	No	No	No
128	MCIP12	Moyen Chari	Niellim	Niellim	12_60	male	positive	37.8	rural	Fulani	august	no	rainy	4	2	2	8	monogamous	surface_water	Yes	No	No	Yes	Yes	No	No	No	No	43	1	Yes	Yes	No	No	Yes	No	Yes	No	No	No	Yes	No	No	No	No	Yes	No	No	No
129	MCIP13	Moyen Chari	Niellim	Niellim	12_60	female	positive	37	rural	Fulani	august	no	rainy	2	2	0	4	monogamous	surface_water	Yes	Yes	No	Yes	Yes	Yes	No	No	No	48	19	Yes	Yes	No	No	Yes	Yes	Yes	No	No	No	Yes	No	No	Yes	No	No	No	No	No
130	MCIP14	Moyen Chari	Niellim	Niellim	12_60	male	negative	36	rural	Fulani	august	no	rainy	4	3	2	9	monogamous	surface_water	No	No	No	No	Yes	Yes	No	No	No	73	44	Yes	Yes	No	No	No	Yes	Yes	No	No	No	Yes	No	No	Yes	No	Yes	No	No	No
131	MCIP15	Moyen Chari	Niellim	Niellim	12_60	male	negative	37	rural	Fulani	august	no	rainy	4	4	1	9	polygamous	surface_water	Yes	No	No	Yes	Yes	Yes	No	No	No	47	35	Yes	Yes	Yes	Yes	Yes	Yes	Yes	No	No	No	Yes	No	No	Yes	No	Yes	Yes	No	No
132	MCIP16	Moyen Chari	Niellim	Niellim	12_60	male	positive	36.8	rural	Fulani	august	no	rainy	3	2	2	7	polygamous	surface_water	No	Yes	No	Yes	Yes	Yes	No	No	No	33	0	Yes	No	No	No	No	No	Yes	No	No	No	Yes	No	No	No	No	Yes	No	No	No
133	MCIP17	Moyen Chari	Niellim	Niellim	3_12	male	negative	37.3	rural	Fulani	august	no	rainy	2	0	2	4	monogamous	surface_water	Yes	No	No	Yes	No	Yes	No	No	No	12	3	Yes	No	No	No	No	No	Yes	No	No	No	Yes	No	No	No	No	Yes	No	No	No
134	MCIP18	Moyen Chari	Niellim	Niellim	3_12	female	positive	36	rural	Fulani	august	no	rainy	3	2	1	6	monogamous	surface_water	Yes	No	No	No	Yes	Yes	No	No	No	41	12	Yes	Yes	Yes	No	Yes	Yes	Yes	No	No	No	Yes	No	No	No	No	Yes	No	No	No
135	MCIP19	Moyen Chari	Niellim	Niellim	12_60	female	positive	37	rural	Fulani	august	no	rainy	5	0	3	8	polygamous	surface_water	Yes	Yes	No	No	Yes	Yes	No	No	No	72	21	Yes	No	No	No	No	No	Yes	No	No	No	No	Yes	No	Yes	No	Yes	No	No	No
136	MCIP20	Moyen Chari	Niellim	Niellim	12_60	male	positive	36.6	rural	Fulani	august	no	rainy	3	3	1	7	monogamous	surface_water	Yes	No	No	Yes	Yes	Yes	No	No	No	41	9	Yes	Yes	No	No	No	Yes	Yes	No	No	Yes	No	No	No	No	No	Yes	No	No	No
137	MCIP21	Moyen Chari	Niellim	Niellim	12_60	male	positive	36.3	rural	Fulani	august	no	rainy	2	2	2	6	monogamous	surface_water	Yes	No	No	Yes	No	Yes	No	No	No	82	14	Yes	No	Yes	No	No	No	Yes	No	No	No	Yes	No	No	Yes	No	Yes	No	No	No
138	MCIP22	Moyen Chari	Niellim	Niellim	12_60	male	negative	36.2	rural	Fulani	august	no	rainy	3	1	2	6	monogamous	surface_water	No	No	No	Yes	Yes	Yes	No	No	No	0	49	Yes	Yes	No	No	No	No	Yes	No	No	Yes	No	No	No	No	No	Yes	No	Yes	No
139	MCIP23	Moyen Chari	Niellim	Niellim	12_60	female	negative	36.7	rural	Fulani	august	no	rainy	4	4	1	9	monogamous	surface_water	Yes	Yes	No	No	Yes	No	No	No	No	61	31	Yes	No	Yes	No	No	No	Yes	No	No	No	Yes	No	No	No	No	Yes	No	No	No
140	MCIP24	Moyen Chari	Niellim	Niellim	12_60	male	positive	36	rural	Fulani	august	no	rainy	3	6	3	12	polygamous	surface_water	Yes	Yes	No	Yes	Yes	Yes	No	No	No	63	24	Yes	Yes	Yes	No	No	No	Yes	No	No	No	Yes	No	No	Yes	No	Yes	No	No	Yes
141	MCIP25	Moyen Chari	Niellim	Niellim	12_60	female	negative	37.5	rural	Fulani	august	no	rainy	3	4	1	8	monogamous	surface_water	Yes	Yes	No	Yes	No	Yes	No	No	No	66	19	Yes	No	Yes	No	No	No	Yes	No	No	Yes	No	No	No	Yes	No	Yes	No	No	No
142	MYAA1180221	Chari Baguirmi	Massenya	Massaguet	12_60	female	negative	36.2	urban	Arab	february	Yes	wet	3	6	2	11	monogamous	drilling_water	No	Yes	No	Yes	Yes	Yes	No	No	No	150	30	Yes	Yes	Yes	Yes	No	Yes	Yes	No	No	No	Yes	Yes	Yes	Yes	Yes	No	No	Yes	No
143	MYAA2180221	Chari Baguirmi	Massenya	Massaguet	12_60	male	negative	37.1	urban	Arab	february	Yes	wet	4	9	7	20	polygamous	drilling_water	No	Yes	No	No	No	Yes	No	No	Yes	100	60	No	No	Yes	No	No	No	Yes	No	No	No	Yes	Yes	Yes	Yes	No	Yes	No	Yes	No
144	MYAA3180221	Chari Baguirmi	Massenya	Massaguet	12_60	female	negative	36.9	urban	Arab	february	Yes	wet	2	1	1	4	monogamous	drilling_water	No	No	No	Yes	No	No	No	No	No	80	0	Yes	No	No	No	No	No	No	No	No	No	Yes	Yes	No	Yes	No	Yes	No	Yes	No
145	MYAA4180221	Chari Baguirmi	Massenya	Massaguet	12_60	female	negative	36.8	urban	Arab	february	Yes	wet	2	1	2	5	monogamous	drilling_water	No	No	No	Yes	Yes	No	No	No	No	90	20	Yes	No	Yes	No	Yes	No	No	Yes	No	No	Yes	Yes	Yes	Yes	Yes	Yes	No	Yes	No
146	MYAA5180221	Chari Baguirmi	Massenya	Massaguet	12_60	female	negative	36.7	urban	Arab	february	Yes	wet	6	8	4	18	polygamous	drilling_water	No	Yes	No	Yes	Yes	Yes	No	No	No	300	50	Yes	Yes	Yes	No	Yes	Yes	No	No	No	Yes	Yes	Yes	Yes	Yes	Yes	Yes	No	Yes	No
147	MYAA6180221	Chari Baguirmi	Massenya	Massaguet	12_60	male	positive	37.9	urban	Arab	february	Yes	wet	2	5	1	8	monogamous	surface_water	No	No	No	Yes	Yes	No	No	No	No	180	0	Yes	No	No	No	No	No	Yes	No	No	No	No	Yes	No	Yes	No	No	No	No	No
148	MYAA7180221	Chari Baguirmi	Massenya	Massaguet	12_60	male	positive	37.2	urban	Arab	february	Yes	wet	3	5	1	9	polygamous	drilling_water	No	Yes	No	Yes	Yes	Yes	No	No	Yes	200	70	Yes	Yes	No	No	No	No	Yes	Yes	Yes	Yes	Yes	Yes	Yes	Yes	No	No	No	No	Yes
149	MYAA8180221	Chari Baguirmi	Massenya	Massaguet	12_60	male	positive	36.7	urban	Arab	february	Yes	wet	5	3	2	10	polygamous	drilling_water	No	Yes	No	Yes	Yes	No	No	No	No	60	15	Yes	No	No	No	No	No	Yes	No	No	No	No	Yes	No	Yes	Yes	No	No	No	No
150	MYAA9180221	Chari Baguirmi	Massenya	Massaguet	12_60	male	negative	37.1	urban	Arab	february	Yes	wet	2	5	1	8	monogamous	drilling_water	No	Yes	No	Yes	Yes	No	No	No	No	250	0	No	No	Yes	No	No	No	Yes	No	No	No	Yes	Yes	No	Yes	No	No	No	Yes	No
151	MYAA10180221	Chari Baguirmi	Massenya	Massaguet	12_60	female	positive	37.9	urban	Arab	february	Yes	wet	6	9	5	20	polygamous	drilling_water	No	Yes	No	No	Yes	Yes	No	No	No	500	150	No	No	No	No	No	No	Yes	No	No	No	No	Yes	Yes	Yes	No	Yes	No	No	No
152	MYAA11180221	Chari Baguirmi	Massenya	Massaguet	12_60	male	negative	37.4	urban	Arab	february	Yes	wet	2	2	2	6	monogamous	drilling_water	No	No	No	Yes	Yes	No	No	No	No	100	0	Yes	No	Yes	No	Yes	No	Yes	No	No	No	Yes	Yes	Yes	No	Yes	Yes	No	Yes	No
153	META1	Hadjer Lamis	Massaguet	Massaguet	12_60	male	negative		urban	Arab	august	Yes	rainy	2	2	2	6	monogamous	drilling_water	No	No	No	Yes	Yes	No	No	No	No	58	23	Yes	Yes	Yes	No	No	No	Yes	No	No	No	No	Yes	Yes	Yes	No	No	No	Yes	No
154	META2	Hadjer Lamis	Massaguet	Massaguet	12_60	male	negative		urban	Arab	august	Yes	rainy	2	1	3	6	monogamous	surface_water	No	No	No	Yes	Yes	Yes	No	No	No	50	10	Yes	Yes	No	No	No	No	Yes	No	Yes	No	Yes	Yes	Yes	Yes	No	Yes	No	Yes	No
155	META3	Hadjer Lamis	Massaguet	Massaguet	12_60	female	negative		urban	Arab	august	Yes	rainy	2	0	2	4	monogamous	drilling_water	Yes	Yes	No	Yes	Yes	No	No	No	No	40	30	No	Yes	No	Yes	Yes	No	No	No	Yes	Yes	Yes	Yes	No	No	No	Yes	Yes	Yes	No
156	META4	Hadjer Lamis	Massaguet	Massaguet	12_60	female	negative		urban	Arab	august	Yes	rainy	2	2	2	6	monogamous	tower	Yes	No	No	Yes	No	Yes	No	No	No	52	50	Yes	Yes	No	No	Yes	No	No	No	No	Yes	Yes	Yes	Yes	Yes	No	Yes	No	Yes	No
157	META5	Hadjer Lamis	Massaguet	Massaguet	12_60	male	negative		urban	Arab	august	Yes	rainy	2	2	2	6	monogamous	tower	No	No	No	Yes	Yes	Yes	No	No	No	50	35	No	Yes	Yes	No	Yes	No	No	No	No	No	Yes	Yes	Yes	No	No	Yes	Yes	No	Yes
158	META6	Hadjer Lamis	Massaguet	Massaguet	12_60	female	negative		urban	Arab	august	Yes	rainy	2	2	2	6	monogamous	tower	No	No	No	Yes	Yes	Yes	No	No	No	60	24	No	No	No	Yes	Yes	No	Yes	Yes	Yes	Yes	Yes	Yes	Yes	No	No	Yes	No	Yes	No
159	META7	Hadjer Lamis	Massaguet	Massaguet	12_60	female	negative		urban	Arab	august	Yes	rainy	2	2	1	5	monogamous	tower	No	No	No	Yes	Yes	No	No	No	No	40	100	Yes	Yes	Yes	Yes	No	No	No	No	No	Yes	Yes	Yes	Yes	No	No	Yes	No	Yes	No
160	META8	Hadjer Lamis	Massaguet	Massaguet	12_60	male	negative		urban	Arab	august	Yes	rainy	2	2	2	6	monogamous	tower	No	No	No	Yes	Yes	Yes	No	No	No	50	123	No	Yes	Yes	Yes	Yes	No	Yes	No	No	Yes	Yes	Yes	Yes	No	Yes	Yes	No	Yes	No
161	META9	Hadjer Lamis	Massaguet	Massaguet	12_60	male	positive		urban	Arab	august	Yes	rainy	2	1	2	5	monogamous	tower	No	No	No	Yes	Yes	No	No	No	No	46	28	No	Yes	Yes	No	Yes	No	Yes	No	No	Yes	Yes	Yes	Yes	Yes	Yes	Yes	No	Yes	No
162	META10	Hadjer Lamis	Massaguet	Massaguet	12_60	female	negative		urban	Arab	august	Yes	rainy	2	0	2	4	monogamous	tower	Yes	No	No	No	Yes	Yes	No	No	No	60	50	Yes	No	No	Yes	No	Yes	Yes	No	Yes	No	Yes	Yes	No	Yes	Yes	No	Yes	No	No
163	META11	Hadjer Lamis	Massaguet	Massaguet	12_60	male	negative		urban	Arab	august	Yes	rainy	2	0	3	5	monogamous	tower	Yes	Yes	No	Yes	No	Yes	No	No	No	60	70	Yes	No	Yes	No	No	No	Yes	No	Yes	Yes	Yes	Yes	Yes	Yes	No	No	Yes	Yes	No
164	META12	Hadjer Lamis	Massaguet	Massaguet	12_60	female	negative		urban	Arab	august	Yes	rainy	2	2	2	6	monogamous	drilling_water	No	No	No	Yes	Yes	No	No	No	No	70	20	No	No	Yes	Yes	Yes	No	No	No	No	No	No	Yes	Yes	No	No	Yes	Yes	Yes	No
165	META13	Hadjer Lamis	Massaguet	Massaguet	12_60	female	negative		urban	Arab	august	Yes	rainy	2	0	3	5	monogamous	tower	No	No	No	Yes	No	No	No	No	No	80	40	Yes	No	Yes	No	Yes	No	No	No	Yes	No	Yes	Yes	Yes	No	Yes	Yes	No	Yes	No
166	META14	Hadjer Lamis	Massaguet	Massaguet	12_60	female	positive		urban	Arab	august	Yes	rainy	2	2	1	5	monogamous	surface_water	No	No	No	Yes	No	Yes	No	No	No	50	60	Yes	No	No	Yes	No	Yes	Yes	Yes	Yes	No	No	Yes	No	Yes	Yes	No	No	No	No
167	META15	Hadjer Lamis	Massaguet	Massaguet	12_60	female	negative		urban	Arab	august	Yes	rainy	2	0	2	4	monogamous	surface_water	No	No	No	Yes	No	No	No	No	No	50	54	Yes	No	Yes	No	No	Yes	Yes	No	No	Yes	No	Yes	Yes	Yes	Yes	No	Yes	No	No
168	META16	Hadjer Lamis	Massaguet	Massaguet	12_60	female	negative		urban	Arab	august	Yes	rainy	2	2	4	8	monogamous	surface_water	Yes	No	No	Yes	No	No	No	No	No	30	100	Yes	No	No	No	Yes	No	No	No	Yes	No	Yes	No	Yes	Yes	Yes	No	Yes	No	No
169	META17	Hadjer Lamis	Massaguet	Massaguet	12_60	female	negative		urban	Arab	august	Yes	rainy	2	3	2	7	monogamous	surface_water	Yes	No	No	Yes	No	No	No	No	No	50	35	Yes	No	No	Yes	No	No	Yes	No	No	Yes	No	Yes	Yes	No	No	Yes	Yes	Yes	No
170	META18	Hadjer Lamis	Massaguet	Massaguet	12_60	male	negative		urban	Arab	august	Yes	rainy	2	2	2	6	monogamous	surface_water	Yes	No	No	Yes	Yes	No	No	No	No	80	50	No	Yes	Yes	No	No	No	Yes	Yes	Yes	No	No	No	Yes	Yes	Yes	No	Yes	No	No
171	META19	Hadjer Lamis	Massaguet	Massaguet	3_12	male	negative		urban	Arab	august	Yes	rainy	1	2	1	4	widow	surface_water	No	No	No	Yes	Yes	No	No	No	No	100	80	No	Yes	Yes	Yes	No	No	Yes	Yes	No	No	Yes	Yes	Yes	Yes	Yes	No	Yes	Yes	No
172	META20	Hadjer Lamis	Massaguet	Massaguet	12_60	female	negative		urban	Arab	august	Yes	rainy	2	1	2	5	monogamous	surface_water	Yes	No	No	Yes	Yes	No	No	No	No	50	130	No	Yes	Yes	Yes	No	No	Yes	No	Yes	No	Yes	Yes	Yes	No	Yes	No	Yes	Yes	No
173	META21	Hadjer Lamis	Massaguet	Massaguet	12_60	male	negative		urban	Arab	august	Yes	rainy	1	2	2	5	widow	surface_water	No	No	No	Yes	Yes	No	No	No	No	38	20	No	No	Yes	Yes	No	No	Yes	Yes	Yes	Yes	Yes	Yes	Yes	Yes	Yes	No	Yes	Yes	No
174	META22	Hadjer Lamis	Massaguet	Massaguet	3_12	male	negative		urban	Arab	august	Yes	rainy	2	0	3	5	monogamous	surface_water	Yes	No	No	Yes	Yes	Yes	No	No	No	40	100	Yes	No	Yes	No	No	No	Yes	No	No	Yes	Yes	Yes	Yes	No	No	Yes	No	Yes	No
175	META23	Hadjer Lamis	Massaguet	Massaguet	12_60	male	negative		urban	Arab	august	Yes	rainy	2	0	1	3	monogamous	surface_water	Yes	No	No	Yes	Yes	Yes	No	No	No	50	30	Yes	No	No	No	No	No	Yes	No	No	Yes	Yes	Yes	Yes	Yes	Yes	No	No	No	No
176	META24	Hadjer Lamis	Massaguet	Massaguet	12_60	female	negative		urban	Arab	august	Yes	rainy	2	0	0	2	monogamous	surface_water	Yes	No	No	Yes	Yes	Yes	No	No	No	50	0	No	Yes	Yes	Yes	No	Yes	No	Yes	No	No	No	No	Yes	Yes	Yes	No	Yes	No	No
177	META25	Hadjer Lamis	Massaguet	Massaguet	12_60	female	negative		urban	Arab	august	Yes	rainy	2	3	2	7	monogamous	well	Yes	No	No	Yes	No	No	No	No	No	50	0	Yes	No	Yes	No	No	No	Yes	No	No	Yes	Yes	Yes	Yes	Yes	No	Yes	Yes	Yes	No
178	META26	Hadjer Lamis	Massaguet	Massaguet	12_60	female	negative		urban	Arab	august	Yes	rainy	4	3	2	9	monogamous	surface_water	No	No	No	No	No	No	No	No	No	50	48	Yes	No	No	No	No	No	Yes	No	No	No	No	Yes	No	Yes	No	Yes	Yes	No	No
179	META27	Hadjer Lamis	Massaguet	Massaguet	12_60	male	negative		urban	Arab	august	Yes	rainy	5	4	1	10	monogamous	surface_water	No	No	No	No	No	No	No	No	No	45	18	Yes	No	No	No	Yes	No	Yes	No	No	No	No	Yes	No	No	No	Yes	Yes	No	No
180	META28	Hadjer Lamis	Massaguet	Massaguet	12_60	female	positive		urban	Arab	august	Yes	rainy	3	2	2	7	monogamous	surface_water	No	No	No	No	No	No	No	No	No	60	15	No	Yes	No	No	Yes	No	Yes	No	No	No	No	Yes	No	Yes	No	Yes	Yes	No	No
181	META29	Hadjer Lamis	Massaguet	Massaguet	12_60	male	negative		urban	Arab	august	Yes	rainy	4	3	1	8	monogamous	surface_water	No	No	No	No	No	No	No	No	No	50	25	Yes	No	No	No	Yes	No	Yes	No	No	No	No	Yes	No	Yes	No	Yes	Yes	No	No
182	META30	Hadjer Lamis	Massaguet	Massaguet	12_60	male	negative		urban	Arab	august	Yes	rainy	3	3	2	8	monogamous	surface_water	No	No	No	No	No	No	No	No	No	35	19	Yes	No	No	No	Yes	No	Yes	No	No	No	No	Yes	No	No	No	Yes	Yes	No	No
183	META31	Hadjer Lamis	Massaguet	Massaguet	12_60	female	negative		urban	Arab	august	Yes	rainy	4	4	1	9	monogamous	surface_water	No	No	No	Yes	No	Yes	No	No	No	28	12	Yes	No	Yes	No	Yes	No	Yes	No	No	No	No	Yes	No	No	No	Yes	Yes	No	No
184	META32	Hadjer Lamis	Massaguet	Massaguet	12_60	female	negative		urban	Arab	august	Yes	rainy	3	2	2	7	monogamous	surface_water	No	No	No	Yes	No	No	No	No	No	28	22	Yes	No	No	No	No	No	Yes	No	No	No	No	Yes	Yes	Yes	No	Yes	No	No	No
185	META33	Hadjer Lamis	Massaguet	Massaguet	12_60	male	negative		urban	Arab	august	Yes	rainy	5	2	2	9	monogamous	surface_water	No	No	No	Yes	No	No	No	No	No	40	24	Yes	No	No	No	No	No	Yes	No	No	No	No	Yes	No	Yes	No	Yes	No	Yes	No
186	META34	Hadjer Lamis	Massaguet	Massaguet	12_60	male	negative		urban	Arab	august	Yes	rainy	6	3	1	10	widow	surface_water	No	No	No	No	No	No	No	No	No	25	13	Yes	No	No	No	No	No	Yes	No	No	No	No	Yes	Yes	Yes	No	Yes	Yes	No	No
187	META35	Hadjer Lamis	Massaguet	Massaguet	3_12	male	negative		urban	Arab	august	Yes	rainy	4	2	2	8	monogamous	surface_water	No	No	No	Yes	No	No	No	No	No	45	21	Yes	No	No	Yes	No	No	Yes	No	No	No	No	Yes	Yes	Yes	No	Yes	No	Yes	No
[truncated: 23 more columns]
